1 **Diversity in rest-activity patterns among Lake Malawi cichlid fishes suggests novel**  
2 **axis of habitat partitioning**

3

4 Evan Lloyd<sup>1</sup>, Brian Chhouk<sup>2</sup>, Alex C. Keene<sup>1#</sup>, R. Craig Albertson<sup>2#</sup>

5

6

7 <sup>1</sup> Department of Biological Science, Florida Atlantic University, Jupiter, FL 33401

8 <sup>2</sup> Department of Biology, University of Massachusetts, Amherst, MA 01003

9

10 # These authors contributed equally to this work

11

12 **Abstract**

13 Animals display remarkable diversity in rest and activity patterns that are regulated by  
14 endogenous foraging strategies, social behaviors, and predator avoidance. Alteration in  
15 the circadian timing of activity or the duration of rest-wake cycles provide a central  
16 mechanism for animals to exploit novel niches. The diversity of the 3000+ cichlid species  
17 throughout the world provides a unique opportunity to examine variation in locomotor  
18 activity and rest. Lake Malawi alone is home to over 500 species of cichlids that display  
19 divergent behaviors and inhabit well-defined niches throughout the lake. These species  
20 are presumed to be diurnal, though this has never been tested systematically. Here, we  
21 measure locomotor activity across the circadian cycle in 12 cichlid species from divergent  
22 lineages and distinct habitats. We document surprising variability in the circadian time of  
23 locomotor activity and the duration of rest. In particular, we identify a single species,  
24 *Tropheops* sp. “red cheek” that is nocturnal. Nocturnal behavior was maintained when  
25 fish were provided shelter, but not under constant darkness, suggesting it results from  
26 acute response to light rather than an endogenous circadian rhythm. Finally, we show  
27 that nocturnality is associated with increased eye size, suggesting a link between visual  
28 processing and nighttime activity. Together, these findings identify diversity of locomotor  
29 behavior in Lake Malawi cichlids and provide a system for investigating the molecular and  
30 neural basis underlying the evolution of nocturnal activity.

31

## 32 1. Introduction

33 Animals display remarkable diversity in rest and activity patterns. Circadian differences in  
34 locomotor activity and rest can differ dramatically between closely related species, or  
35 even between individuals of the same species, raising the possibility that it can be  
36 adaptive and subject to selection[1–3]. Indeed, circadian regulation of locomotor activity  
37 is strongly associated with foraging strategies, social behaviors, and predator avoidance  
38 that are critical factors in organismal fitness[4,5]. Alteration in the circadian timing of  
39 activity or the duration of rest-wake cycles provide a central mechanism for animals to  
40 exploit novel niches.

41  
42 Across phyla the timing of rest and activity is regulated by a circadian clock that persists  
43 under constant conditions, as well as acute response to environmental cues that include  
44 light and food availability[6]. For example, many teleost species display robust diurnal  
45 locomotor rhythms including the goldfish (*Carassius Auratus*), the Mexican tetra  
46 (*Astyanax mexicanus*), and the zebrafish (*Danio rerio*)[1,7,8]. Conversely, limited  
47 examples of nocturnal teleosts have been identified including the plainfin midshipman,  
48 the Senegalese sole, and the doctor fish, *Tinca tinca* [9–11]. Despite these conspicuous  
49 differences, variation in rest and activity patterns have not been well described within a  
50 lineage. Moreover, the ecological basis of such variation, and its relationship to niche  
51 exploitation has not been studied systematically.

52  
53 Cichlids represent a leading model for investigating the evolution of development,  
54 morphology, and complex behavior. In Lake Malawi alone, there are over 500 species of

55 cichlids, inhabiting a diversity of environmental and feeding niches. Cichlid species exhibit  
56 a high degree of habitat fidelity and partition their environment along discrete ecological  
57 axes, including distinct biotic (food availability, predation, and parasites) and abiotic (light,  
58 water chemistry) environments that play a critical role in the origins and maintenance of  
59 cichlid biodiversity[12–17]. Predation on Malawi cichlids is considered to be relatively low,  
60 which is thought to have contributed to their evolutionary and ecological success[18].  
61 However, the lake is home to predators, including the Cornish jack *Mormyrops*  
62 *anguilloides*, that feed on cichlids in the intermediate and near-shore rocky habitat. *M.*  
63 *anguilloides* are weakly electric fish that hunt at night using electrical pulses thought to  
64 be undetectable by cichlids[19]. Field studies on this predatory behavior have suggested  
65 that cichlids are largely diurnal[19], in agreement with the notion that rest represents a  
66 form of adaptive inactivity that allows for predator avoidance[20]. Deviations from diurnal  
67 activity have been noted for new world cichlids, which exhibit nocturnal parental care of  
68 eggs[21,22], and the ability of some Malawi cichlids to forage in low-light conditions, via  
69 widened lateral line canals, suggests the potential for nocturnal behaviors to evolve in this  
70 group[23]. Given that Malawi cichlids exhibit an impressive magnitude of diversity in an  
71 array of anatomical and behavioral traits, we reasoned that they may also exhibit variation  
72 in rest-activity patterns. Indeed, this could represent an important, but underappreciated,  
73 dimension of habitat partitioning.

74

75 The development of automated tracking of locomotor activity in fish species has been  
76 applied for the study of sleep and locomotor activity in zebrafish and Mexican  
77 cavefish[24]. These methodologies provide the opportunity for comparative approaches

78 that examine differences in activity between populations, and across contexts. Here, we  
79 extend this methodology to study sleep across 12 species of cichlids, from diverse  
80 habitats. Our choice of species focuses on the near-shore rock-dwelling clade of Malawi  
81 cichlids (i.e., *mbuna*), but we also include representative species from other major  
82 lineages. Our goal is not to characterize the evolution of rest-activity patterns *per se*, but  
83 rather to better understand the degree and type of variation exhibited by this group. We  
84 identify robust variation in the quantity, as well as the circadian timing, of rest and activity.  
85 In addition, this analysis reveals, for the first time, a nocturnal species of Malawi cichlid,  
86 suggesting that circadian regulation of activity may provide a mechanism for niche  
87 exploitation in African cichlids. Together, these findings suggest cichlids can be used as  
88 a model to study the evolution of molecular mechanisms for variation in locomotor  
89 rhythms.

90

## 91 **2. Materials and Methods**

### 92 *(a) Fish stocks and husbandry*

93 Cichlids used for experiments were reared following standard protocols approved by the  
94 University of Massachusetts Institutional Animal Care and Use Committee. Cichlids  
95 were housed in the Albertson fish facilities at a water temperature of 28.5°C, kept on a  
96 14:10 hour light-dark cycle, and fed a diet of a flake mixture consisting of ~75% spirulina  
97 algae flake and ~25% yolk flake twice a day. Cichlids were derived from wild-caught  
98 animals that were either reared in the Albertson fish facilities (*Labeotropheus*  
99 *trewavasae*, *Maylandia zebra*, *Tropheops* sp. “red cheek”), or obtained through the  
100 aquarium trade (*Sciaenochromis fryeri*, *Copadichromis trewavasae*, *Aulonocara*

101 *stuartgranti*, *Dimidiochromis compressiceps*, *Labeotropheus fuelleborni*, *Iodotropheus*  
102 *sprengerae*, *Tropheops* sp. “red fin”, *Tropheops* sp. “elongatus Boadzulu”). Because of  
103 the nature of the testing tanks (see below), all fish were tested at the late juvenile stage,  
104 making sex determination difficult to assess at the time; however, after the experiments  
105 took place, stocks were grown out and it could be confirmed that sex ratios were 50:50  
106 on average.

107

108 *(b) Behavioral analysis*

109 24 hours prior to the beginning of each experiment, juvenile fish were transferred from  
110 their home tanks into 10L tanks (Carolina Biologicals) with custom-designed partitions  
111 that allowed for up to 3 fish to be individually housed in each tank. After 24 hours of  
112 acclimation, fish were fed, tanks were given a 50% water change to maintain water  
113 quality, and behavior was recorded for a 24 hour period beginning at zeitgeber time (ZT)  
114 3, 3 hours after light onset. Videos were recorded at 15 frames/second using a USB  
115 webcam (LifeCam Studio 1080p HD Webcam, Microsoft) through the video processing  
116 software VirtualDub (v1.10.4). To allow for recording during the dark period and provide  
117 consistent lighting throughout the day, cameras were modified by removing their IR  
118 filters and replacing with IR long-pass filters (Edmund Optics Worldwide), and tanks  
119 were illuminated from behind using IR light strips (Infrared 850 nm 5050 LED Strip Light,  
120 Environmental Lights).

121

122 For experiments testing the effect of shelter on locomotor activity, a small PVC tube, 3”  
123 in length x 1” outer diameter, was added to each chamber at the beginning of the

124 acclimation period. For experiments testing the effect of light, fish were acclimated to  
125 their tanks on a normal 14:10 LD cycle, and then recorded in 24 hours of darkness.

126

127 Following acquisition, recordings were processed in Ethovision XT 15 (Noldus) to  
128 extract positional data for individual fish throughout the 24 hour period, and this data  
129 was used to calculate velocity and locomotor activity, as previously described[25].

130

### 131 *(c) Analysis of activity and rest*

132 To identify variation in rest and activity patterns across cichlid species, positional data  
133 was exported from Ethovision and analyzed using a custom-made Perl script (v5.10.0)  
134 and Excel Macro (Microsoft). A threshold of 4 cm/sec was set to correct for passive drift  
135 of the animal; any reading over this threshold was classified as active swimming and  
136 used to calculate velocity. Any period of inactivity lasting greater than 60 seconds was  
137 classified as a “rest” bout, and the time and duration of each rest bout was recorded to  
138 generate profiles of rest throughout the day.

139

### 140 *(d) Measurements of eye size*

141 Fish were imaged using a digital camera (Olympus E520) mounted to a camera stand.  
142 All images included a ruler. Using the program Image J[26], measures of standard  
143 length, head length, and eye area were obtained for each fish. Eye size was measured  
144 in fish used in the behavioral analysis. In addition, when possible, we augmented these  
145 samples with wild-caught animals from the Albertson lab collections. In particular, we  
146 added wild-caught samples to the *L. fuelleborni*, *M. zebra*, *T. sp.* “red cheek”, and *T. sp.*

147 “red fin” populations. Two measures of eye-size were obtained: total area, and area  
148 relative to head length. Because relative eye-size exhibits strong allometric  
149 effects[27],residuals were obtained via a linear regression of eye-size on standard  
150 length in R[28]. All statistical analyses were based on residuals. Results were the same  
151 whether we used absolute eye-size or eye-size relative to head length. We therefore  
152 only present data using absolute eye-size.

153

#### 154 *(e) Statistics and analysis*

155 One-Way ANOVAs were carried to identify inter-species differences in overall locomotor  
156 activity, average waking velocity, rest duration, and total time in shelter between  
157 species. To identify differences between multiple conditions, such as activity in the light  
158 vs. dark, or shelter vs no-shelter conditions, a Two-Way ANOVA was carried out, and  
159 followed by Sidak’s multiple comparisons *post-hoc* test. To identify significant rhythms in  
160 activity across the day-night cycle, an “activity change ratio” was calculated as follows:  
161 First, average hourly day- and night-time activity were calculated for each fish. Night-  
162 time activity was subtracted from day-time activity, and the result was divided by their  
163 sum, providing a normalized day/night preference score. To identify significant  
164 rhythmicity, one-sample t-tests were performed. To identify differences between the  
165 *mbuna* and non-*mbuna* groups, nested ANOVAs were performed. All statistical  
166 analyses were carried out using InStat software (GraphPad Prism 8).



167

### 168 3. Results

#### 169 (a) Variation in activity and rest behaviors

170 To measure variation in activity across Lake Malawi cichlids, we compared the locomotor  
171 activity in twelve different species, across eight genera, of cichlids that were selected for  
172 diversity in habitat, behavior, and lineage representation. We sampled more deeply in the  
173 rock-frequenting *mbuna* clade (n=7 species; n=4 genera), which occupy a complex, three-  
174 dimensional habitat characterized by a high density of cichlid individuals (Fig 1A). In  
175 addition, we analyzed activity patterns in four non-*mbuna* species, which occupy the  
176 intermediate to open-water habitat (Fig 1B). Following an initial 24 hour period of  
177 acclimation, activity was recorded in individually housed juvenile fish across 24 hours in  
178 standard light-dark conditions, with infrared lighting used to monitor locomotor activity  
179 during the night as previously described in *A. mexicanus*[25]. Quantification of total  
180 locomotor activity over 24 hours identified marked variation across species, with certain  
181 species (i.e., *S. fryeri*) exhibiting significantly lower activity than all other species tested,  
182 while the activity of others (i.e., *T. sp. "elongatus Boadzulu"*) was significantly greater than  
183 all other species (Fig 1C). Notably, variation in mean activity was continuously distributed  
184 between these two extremes. In addition, there was a division between *mbuna* and non-  
185 *mbuna* species, with *mbuna* species trending towards increased locomotion relative to  
186 non-*mbuna* species ( $p = 0.052$ ).

187

188 To determine whether these differences were due to hyperactivity or differences in rest,  
189 we measured the average waking velocity for each population. Among all species tested,

190 only one (*T. sp. “elongatus Boadzulu”*), displayed significantly higher swimming velocity,  
191 suggesting the bulk of the variation among species is due to differences in rest/activity  
192 regulation (Fig 1D). In agreement with this notion, there were significant inter-species  
193 differences in the duration of rest bouts lasting greater than one minute (Fig 1E). The  
194 majority of species displayed very little rest, averaging less than 3 hours/day, while three  
195 species, *C. trewavasae*, *D. compressiceps*, and *S. fryeri* (all non-*mbuna*) spent  
196 significantly longer resting than all other species tested. The average rest duration of *S.*  
197 *fryeri* was over 10-fold different than other species tested. Together, these findings  
198 suggest that differences in total locomotor activity between cichlid species are largely  
199 attributable to differences in rest. Notably, *mbuna* species together rested significantly  
200 less than non-*mbuna* species (Fig 1E), possibly reflecting adaptation to the near-shore  
201 rocky habitat. Support for this possibility, as opposed to historical contingency, is the  
202 observation that *A. stuartgranti*, a non-*mbuna* species that co-occurs with *mbuna*, rests  
203 less than other non-*mbuna* species (Fig 1E).

204

#### 205 *(b) Variation in patterns and magnitudes of rhythmic activity*

206 To determine whether there are differences in circadian modulation of activity, we  
207 compared activity over the light-dark cycle (Fig 2A). We found evidence for strong diurnal  
208 activity in three *mbuna* species (*L. fuelleborni*, *T. sp. “elongatus Boadzulu”*, and *I.*  
209 *sprengerae*), while activity did not significantly differ based on light or dark phases in  
210 seven species tested (Fig 2B). A single species, *Tropheops sp. “red cheek”*, was  
211 significantly more active in the night, providing the first evidence for nocturnality in a Lake  
212 Malawi cichlid (Fig 2B). To account for variation in total locomotion between fish of

213 different species, we quantified preference for light and dark activity for each individual  
214 tested. In agreement with quantification of average locomotor activity, *T. sp.* “red cheek”  
215 had significantly greater preference for nighttime activity while *L. fuelleborni*, *T. sp.*  
216 “elongatus Boadzulu”, and *I. sprengerae*, had significantly greater preference for daytime  
217 activity (Fig 2C). This analysis also suggests a preference for diurnal activity in *L.*  
218 *trewavasae*, and for nocturnal activity in two additional non-*mbuna* species (*C.*  
219 *trewavasae* and *S. fryeri*).

220

221 In other diurnal teleosts, such as *A. mexicanus* and *D. rerio*, rest is largely consolidated  
222 during nighttime. To quantify time of day differences in rest across cichlid species, we  
223 compared the average amount of rest per hour across the 14 hours of light and 10 hour  
224 dark periods (Fig S1). This analysis is largely in agreement with analysis of locomotor  
225 activity, with day-active species consolidating rest during the dark period, and *vice versa*.

226

227 Since *T. sp.* “red cheek” is a highly territorial and aggressive species[29,30], it is possible  
228 that the nighttime activity of this species represents a search strategy for locations that  
229 provide shelter from predators, as opposed to a natural reflection of activity patterns. To  
230 differentiate between these possibilities, we provided each animal with a 3 inch cylindrical  
231 shelter (PVC piping), and measured behavior across light and dark conditions (Fig 3A).  
232 We analyzed the total activity across the circadian cycle, as well as time spent in the  
233 shelter in *T. sp.* “red cheek”, as well as in *L. trewavasae* and *M. zebra*, closely related  
234 *mbuna* species that co-occur with *T. sp.* “red cheek”. These two species also exhibited  
235 lower and indistinguishable activity levels during the day and night, and we were

236 interested to see if the addition of shelter would alter this pattern. When provided a hiding  
237 spot, *T. sp.* “red cheek” remained robustly nocturnal, while *M. zebra* and *L. trewavasae*  
238 did not show light dark preference, which is consistent with their activity patterns in the  
239 absence of shelter (Fig 3B). We quantified the total time animals spent within the shelter  
240 and found that *L. trewavasae* spent significantly more time in the shelter than *M. zebra*  
241 and *T. sp.* “red cheek” (Fig 3C), which is consistent with this species’ behavior in the wild.  
242 *L. trewavasae* has an elongated and dorsal-ventrally compressed body plan, and exhibits  
243 habitat preference for cracks and crevices in the wild[30,31]. Further, *L. trewavasae* spent  
244 more time in the shelter during the night period, consistent with an increased need to  
245 avoid nocturnal predators (Fig 3D). Conversely, there were no differences in shelter  
246 preference between light or dark periods for *M. zebra* and *T. sp.* “red cheek”. Together,  
247 these findings suggest that the presence of a shelter does not significantly impact the  
248 activity pattern of the cichlid species tested, and that the nocturnal locomotor activity of  
249 *T. sp.* “red cheek” does not represent a search for shelter.

250  
251 It is possible that the nocturnal locomotor behavior of *T. sp.* “red cheek” is due to an  
252 endogenous circadian rhythm or a differential response to light. To distinguish between  
253 these possibilities, we measured locomotor activity under constant dark conditions.  
254 Briefly, fish were acclimated under standard 14:10 light dark conditions, then activity was  
255 recorded for 24 hours under constant darkness (Fig 4A). While *T. sp.* “red cheek” are  
256 significantly more active during the dark period under light:dark conditions, there was no  
257 difference between light and dark activity under constant darkness. (Fig 4A). A  
258 comparison of total activity between the day (with light present) and the subjective day

259 (darkness) reveals that activity is significantly lower in the presence of light (Fig 4B).  
260 These findings are consistent with a role for light in suppressing activity, thereby inducing  
261 nocturnal behavior.

262

263 *(c) Activity is higher in territorial species*

264 General information regarding each species', habitat, behavior, prey-preference, and  
265 phylogenetic relationship is provided in Table 1. To determine whether any variables of  
266 rest or activity associate with these ecological factors, we compared locomotor data with  
267 known ecological variables. Unsurprisingly, species described as territorial exhibited, on  
268 average, greater overall activity compared to those characterized as weakly or non-  
269 territorial. We note, however, that any conclusion about the relationship between  
270 locomotor activity and ecology/phylogeny may be premature, as significant differences in  
271 rest-activity behavior exist between closely related and ecologically similar species (e.g.,  
272 within *Tropheops* and *Labeotropheops*). The more general conclusion to be drawn from  
273 these data is that Lake Malawi cichlids exhibit substantial and continuous variation in  
274 activity levels and patterns.

275

276 *(d) Eye size is associated with night-time activity*

277 Across fish species, nocturnality or adaptation to low-light conditions is associated with  
278 larger eye size. In addition, species that rely on visual modes of foraging generally  
279 develop larger eyes[32–34]. On the other hand, species adapted to forage on attached  
280 algae generally possess smaller eyes, consistent with a functional tradeoff for the  
281 production of power during jaw closure[35]. Specifically, algal scrapers tend to exhibit

282 smaller and dorsally shifted eyes to accommodate larger adductor muscles that are  
283 situated below the eyes[36]. To understand how eye size relates to these variables, we  
284 measured eye size in cichlid individuals in all species tested (Fig 5A, 5B), and tested for  
285 significant correlations. Notably, we did not observe an obvious association between eye  
286 size and lineage or foraging mode (Fig 5B). While the visual hunting species *C.*  
287 *trewavasae* and *S. fryeri* possess larger eyes on average, *D. compressiceps*, an ambush-  
288 hunter, has the smallest eyes of the species measured. Likewise, while the algal scraping  
289 species within the genus *Labeotropheus* has relatively small eyes, the attached algae  
290 specialists, *T.* sp. “red cheek”, has the largest relative eye size of the species measured.  
291 The other species with large eyes was *A. stuartgranti*, which is a sonar hunter with  
292 enlarged lateral line canals capable of foraging in low-light conditions[23]. Neither did we  
293 identify a correlation between rest amount and eye size (Fig 5C). However, there was a  
294 strong correlation between eye size and preference for night-time activity (Fig 5D).  
295 Whether the large eye size in these species represents an adaptation to nocturnality  
296 remains to be tested, but it is a notable morphological correlate worthy of further  
297 investigation.

298

#### 299 **4. Discussion**

300 The diversity of the ~3000 cichlid species throughout the world provides a unique  
301 opportunity to examine the effects of ecological niche and evolutionary history on the  
302 regulation of locomotor activity and rest. Cichlid species have undergone adaptive  
303 radiations, resulting in morphologies and behaviors that can be highly specialized to  
304 specific ecological niches. The ecology inhabited by cichlids includes species with habitat

305 fidelity to shorelines, deep water, and the intermediate zone between rocky and sandy  
306 regions. In addition, many species are generalists and inhabit multiple different niches.  
307 Here we focused our analysis on Lake Malawi cichlids, that alone likely contains over 500  
308 species of fish, many of which share overlapping ecological niches[37]. The well  
309 characterized ecosystem within the lake, as well as the taxonomic diversity uniquely  
310 positions cichlids for investigating the role of ecology in shaping behavioral evolution.  
311 Indeed, an important outstanding question is how can so many species with dietary  
312 overlap co-exist in this lake? Many factors have been proposed to contribute including  
313 the multitude of ecological resources available in this large tropical lake, low predation,  
314 as well as the ability of cichlid species to evolve highly specific courtship and feeding  
315 behaviors[18,38]. Circadian regulation of activity and rest may provide an additional  
316 contributor to niche partitioning, reproductive isolation and even speciation, yet these  
317 behaviors have not been studied systematically. The finding that the timing and duration  
318 of rest and activity varies dramatically, and continuously, between populations of Lake  
319 Malawi cichlids suggest this is a fruitful line of inquiry.

320

321 While circadian rhythms have been studied in detail across many different animal species,  
322 surprisingly little is known about the presence and regulation of free running rhythms in  
323 teleosts. For example, Nile tilapia, *O. niloticus*, display extreme variability under light-dark  
324 conditions that ranges from diurnal to nocturnal, yet the majority of animals maintain  
325 rhythms of ~24hrs under constant dark conditions[39]. Feeding is likely a critical mediator  
326 of activity rhythms, though in some species, the daily timing of feeding differs from  
327 locomotor activity. For example, zebrafish are highly diurnal and maintain 24 hour

328 rhythms, yet feeding occurs primarily during the night[40]. A similar trend has been noted  
329 in cichlids, where diurnal species exhibit mating and brooding behaviors primarily at  
330 night[21,41]. These findings suggest a high degree of flexibility in the circadian regulation  
331 of behavior, and that the circadian timing of many behaviors may differ from locomotor  
332 behavior that is typically used as a primary readout of the circadian clock[42]. Here, we  
333 focused specifically on locomotor activity and did not provide social conspecifics or food  
334 that could influence the timing of activity. Fully understanding the evolution circadian  
335 behavior of each species and its relationship to its natural environment will require  
336 examining additional behaviors that may be under circadian regulation.

337

338 A notable finding from this study is a species that appears to be nocturnal. *Tropheops sp.*  
339 “red cheek” is a member of a highly speciose and ecologically diverse lineage[13,30,43].  
340 It is a vigorously territorial species that occupies the near shore rocky habitat, where  
341 males defend large patches of rocks, cultivating algae gardens that they only allow  
342 potential mates to feed from. This species exhibits significant habitat and dietary overlap  
343 with *L. fuelleborni*, another algae foraging species from the rocky shallows. *L. fuelleborni*  
344 is arguably one of the most ecologically successful species in the lake, with numerous  
345 anatomical adaptations that enable it to dominate this niche[31,44–46]. How then might  
346 another species coexist with such a well-adapted forager? Based on the results presented  
347 here, it is tempting to speculate that *L. fuelleborni* and *T. sp.* “red cheek” are partitioning  
348 their habitat by rest-activity patterns. Consistently, these two species (1) are among the  
349 most active of any measured, (2) are both strongly rhythmic, and (3) their rhythmicity is  
350 opposite of one another.



351

352 Our findings raise the possibility that *T. sp.* “red cheek” is nocturnal in the wild, and the  
353 limited amount of night filming that has been performed in Lake Malawi supports this  
354 notion. Specifically, Arnegard and Carlson (2005) documented the nocturnal predatory  
355 behavior of the weakly electric species, *M. anguilloides*, on cichlids in the rocky habitat.  
356 The footage (available at <https://malawicichlids.com/mw19000.htm>), is impressive and  
357 shows the success of the “pack” hunting strategy employed by *M. anguilloides*. Two  
358 cichlid species (based on male breeding color) are readily apparent in the footage, *A.*  
359 *stuartgranti* and *T. sp.* “red cheek”. Indeed, the very first fish seen in the night footage is  
360 a male *T. sp.* “red cheek” (@ 1:15). This fish is not resting within a rocky cave, crack or  
361 crevice, but rather it is actively swimming well above the rocks. In fact, in the ~6 minutes  
362 of night footage, no fewer than 5 *T. sp.* “red cheek” individuals can be observed, many *A.*  
363 *stuartgranti* are observed as well. As a point of comparison, no *Labeotropheus* or  
364 *Maylandia* species are readily observed at night, though they are common in the day  
365 footage at the beginning and end of the ~8 minute film. This filming was not intended to  
366 address questions related to rest-activity patterns in cichlids, and so we are cautious  
367 about drawing firm conclusions; however, the trends are conspicuously consistent with  
368 our laboratory results.

369

370 It is important to note that our analyses are limited to rest, and we did not examine sleep  
371 *per se*. Across phyla, ranging from jellyfish to humans, sleep can be defined by shared  
372 behavioral characteristics that include consolidated periods of behavioral quiescence,  
373 homeostasis following deprivation and increased arousal threshold, and species-specific

374 posture[47]. In teleosts, the duration of inactivity associated with sleep has been defined  
375 as one minute of immobility in larval *A. mexicanus* and zebrafish, and the same duration  
376 for adult *A. mexicanus*[48,49]. The duration of sleep and rest is highly variable across  
377 many other teleost species, and even between individuals of the same species. For  
378 example, different populations of *A. mexicanus* display extreme differences in sleep and  
379 activity, with cave dwelling populations of *A. mexicanus* sleeping less than river-dwelling  
380 surface fish counterparts. These differences presumably evolved, at least in part, due to  
381 increased foraging needs in a nutrient-poor cave environment[50]. Based on previous  
382 work in fishes, we defined rest as the total duration of inactivity bouts longer than one  
383 minute, and therefore these phenotypes may reflect differences in sleep duration across  
384 cichlid species. While specifically examining sleep in cichlids will require defining the  
385 period of immobility associated with changes in arousal threshold, posture, position, and  
386 other behavioral characteristics of sleep, we submit that it represents a fruitful line of  
387 inquiry as it offers an ideal system in which to delve further into the evolution of sleep and  
388 its molecular underpinnings.

389

#### 390 **Data accessibility**

391 Will be determined upon acceptance.

392

#### 393 **Author's contributions**

394 A.C.K and R.C.A conceived the project. E.L. and B.C. ran the sleep experiments. R.C.A  
395 measured eye sizes. E.L. analyzed the behavioral and morphological data. A.C.K, E.L.

396 and R.C.A interpreted the results and wrote the manuscript. All authors were involved  
397 with rounds of editing and proofing of the figures and manuscript text.

398

### 399 **Competing interests**

400 The authors declare no competing interests.

401

### 402 **Funding**

403 This work was supported by the University of Massachusetts and Florida Atlantic  
404 University.

405

### 406 **Acknowledgements**

407 We thank members of the Albertson and Keene laboratories for logistical support with  
408 fish care, as well as for thoughtful discussions on various aspects of this project. Ad  
409 Konings, Cichlid Press, provided the images of cichlid species in Figure 1. He is  
410 acknowledged for his continued and generous support of the cichlid research  
411 community through the use of his extensive image library.

412

### 413 **References**

414

- 415 1. Duboué ER, Keene AC, Borowsky RL. 2011 Evolutionary Convergence on Sleep  
416 Loss in Cavefish Populations. *Curr. Biol.* **21**, 671–676.  
417 (doi:10.1016/J.CUB.2011.03.020)
- 418 2. Brown EB, Torres J, Bennick RA, Rozzo V, Kerbs A, DiAngelo JR, Keene AC.

- 419           2018 Variation in sleep and metabolic function is associated with latitude and  
420           average temperature in *Drosophila melanogaster*. *Ecol. Evol.* **8**, 4084–4097.  
421           (doi:10.1002/ece3.3963)
- 422   3.   Hammond TT, Palme R, Lacey EA. 2018 Ecological specialization, variability in  
423           activity patterns and response to environmental change. *Biol. Lett.* **14**, 20180115.  
424           (doi:10.1098/rsbl.2018.0115)
- 425   4.   Vaze KM, Sharma VK. 2013 On the Adaptive Significance of Circadian Clocks for  
426           Their Owners. *Chronobiol. Int.* **30**, 413–433.  
427           (doi:10.3109/07420528.2012.754457)
- 428   5.   Siegel JM. 2005 Clues to the functions of mammalian sleep. *Nature* **437**, 1264–  
429           1271. (doi:10.1038/nature04285)
- 430   6.   Huang W, Ramsey KM, Marcheva B, Bass J. 2011 Circadian rhythms, sleep, and  
431           metabolism. *J. Clin. Invest.* **121**, 2133–2141. (doi:10.1172/JCI46043)
- 432   7.   Iigo M, Tabata M. 1996 Circadian rhythms of locomotor activity in the goldfish  
433           *Carassius auratus*. *Physiol. Behav.* **60**, 775–781. (doi:10.1016/0031-  
434           9384(96)00131-x)
- 435   8.   Zhdanova I V., Wang SY, Leclair OU, Danilova NP. 2001 Melatonin promotes  
436           sleep-like state in zebrafish. *Brain Res.* **903**, 263–268. (doi:10.1016/S0006-  
437           8993(01)02444-1)
- 438   9.   Feng NY, Bass AH. 2016 “Singing” Fish Rely on Circadian Rhythm and Melatonin  
439           for the Timing of Nocturnal Courtship Vocalization. *Curr. Biol.* **26**, 2681–2689.  
440           (doi:10.1016/j.cub.2016.07.079)
- 441   10.   Bayarri MJ, Muñoz-Cueto JA, López-Olmeda JF, Vera LM, Rol De Lama MA,

- 442 Madrid JA, Sánchez-Vázquez FJ. 2004 Daily locomotor activity and melatonin  
443 rhythms in Senegal sole (*Solea senegalensis*). *Physiol. Behav.* **81**, 577–583.  
444 (doi:10.1016/j.physbeh.2004.02.001)
- 445 11. Oliveira C, Garcia EM, López-Olmeda JF, Sánchez-Vázquez FJ. 2009 Daily and  
446 circadian melatonin release in vitro by the pineal organ of two nocturnal teleost  
447 species: Senegal sole (*Solea senegalensis*) and tench (*Tinca tinca*). *Comp.*  
448 *Biochem. Physiol. - A Mol. Integr. Physiol.* **153**, 297–302.  
449 (doi:10.1016/j.cbpa.2009.03.001)
- 450 12. Huber R, Van staaden MJ, Kaufman LS, Liem KF. 1997 Microhabitat use, trophic  
451 patterns, and the evolution of brain structure in african cichlids. *Brain. Behav.*  
452 *Evol.* **50**, 167–182. (doi:10.1159/000113330)
- 453 13. Albertson RC. 2008 Morphological Divergence Predicts Habitat Partitioning in a  
454 Lake Malawi Cichlid Species Complex. *Copeia* **2008**, 689–698. (doi:10.1643/cg-  
455 07-217)
- 456 14. Parnell NF, Todd Streebman J. 2011 The macroecology of rapid evolutionary  
457 radiation. *Proc. R. Soc. B Biol. Sci.* **278**, 2486–2494.  
458 (doi:10.1098/rspb.2010.1950)
- 459 15. Malinsky M *et al.* 2015 Genomic islands of speciation separate cichlid ecomorphs  
460 in an East African crater lake. *Science (80-. )*. **350**, 1493–1498.  
461 (doi:10.1126/science.aac9927)
- 462 16. Terai Y *et al.* 2017 Visual adaptation in Lake Victoria cichlid fishes: Depth-related  
463 variation of color and scotopic opsins in species from sand/mud bottoms. *BMC*  
464 *Evol. Biol.* **17**. (doi:10.1186/s12862-017-1040-x)

- 465 17. Karvonen A, Wagner CE, Selz OM, Seehausen O. 2018 Divergent parasite  
466 infections in sympatric cichlid species in Lake Victoria. *J. Evol. Biol.* **31**, 1313–  
467 1329. (doi:10.1111/jeb.13304)
- 468 18. Fryer G, Iles TD. 1972 cichlid fishes of the great lakes of Africa.
- 469 19. Arnegard ME, Carlson BA. 2005 Electric organ discharge patterns during group  
470 hunting by a mormyrid fish. *Proc. R. Soc. B Biol. Sci.* **272**, 1305–1314.  
471 (doi:10.1098/rspb.2005.3101)
- 472 20. Siegel JM. 2009 Sleep viewed as a state of adaptive inactivity. *Nat. Rev.*  
473 *Neurosci.* **10**, 747–753. (doi:10.1038/nrn2697)
- 474 21. Reeb SG, Colgan PW. 1991 Nocturnal care of eggs and circadian rhythms of  
475 fanning activity in two normally diurnal cichlid fishes, *Cichlasoma nigrofasciatum*  
476 and *Herotilapia multispinosa*. *Anim. Behav.* **41**, 303–311. (doi:10.1016/S0003-  
477 3472(05)80482-8)
- 478 22. Reeb SG, Colgan PW. 1992 Proximal cues for nocturnal egg care in convict  
479 cichlids, *Cichlasoma nigrofasciatum*. *Anim. Behav.* **43**, 209–214.  
480 (doi:10.1016/S0003-3472(05)80216-7)
- 481 23. Schwalbe MAB, Bassett DK, Webb JF. 2012 Feeding in the dark: Lateral-line-  
482 mediated prey detection in the peacock cichlid *Aulonocara stuartgranti*. *J. Exp.*  
483 *Biol.* **215**, 2060–2071. (doi:10.1242/jeb.065920)
- 484 24. Jaggard JB, Lloyd E, Lopatto A, Duboue ER, Keene AC. 2019 Automated  
485 Measurements of Sleep and Locomotor Activity in Mexican Cavefish. *J. Vis. Exp.* ,  
486 e59198. (doi:10.3791/59198)
- 487 25. Yoshizawa M, Robinson BG, Duboué ER, Masek P, Jaggard JB, O'Quin KE,

- 488 Borowsky RL, Jeffery WR, Keene AC. 2015 Distinct genetic architecture underlies  
489 the emergence of sleep loss and prey-seeking behavior in the Mexican cavefish.  
490 *BMC Biol.* **13**. (doi:10.1186/s12915-015-0119-3)
- 491 26. Schneider CA, Rasband WS, Eliceiri KW. 2012 NIH Image to ImageJ: 25 years of  
492 image analysis. *Nat. Methods.* **9**, 671–675. (doi:10.1038/nmeth.2089)
- 493 27. Howland HC, Merola S, Basarab JR. 2004 The allometry and scaling of the size  
494 of vertebrate eyes. *Vision Res.* **44**, 2043–2065. (doi:10.1016/j.visres.2004.03.023)
- 495 28. R Core Team. 2017 *R: A language and environment for statistical computing.* R  
496 *Foundation for Statistical.* Vienna, Austria: R Foundation for Statistical Computing.  
497 See <https://www.r-project.org/>.
- 498 29. Maruyama A, Rusuwa B, Yuma M. 2010 Asymmetric interspecific territorial  
499 competition over food resources amongst Lake Malawi cichlid fishes. *African Zool.*  
500 **45**, 24–31. (doi:10.1080/15627020.2010.11657251)
- 501 30. Ribbink A, Marsh B, Marsh A, Zoology AR-A, 1983 undefined. In press. A  
502 preliminary survey of the cichlid fishes of rocky habitats in Lake Malawi: results.  
503 *ajol.info*.
- 504 31. Konings A. In press. Malawi cichlids in their natural habitat. *3rd edn. Cichlid*  
505 *Press. El Paso, Texas*
- 506 32. Willacker JJ, Von Hippel FA, Wilton PR, Walton KM. 2010 Classification of  
507 threespine stickleback along the benthic-limnetic axis. *Biol. J. Linn. Soc.* **101**,  
508 595–608. (doi:10.1111/j.1095-8312.2010.01531.x)
- 509 33. Archer S. 1999 *Adaptive Mechanisms in the Ecology of Vision.* Boston, MA:  
510 Kluwer Academic Publishers.

- 511 34. Motani R, Rothschild BM, Wahl W. 1999 Large eyeballs in diving ichthyosaurs.  
512 *Nature* **402**, 747. (doi:10.1038/45435)
- 513 35. Hulsey CD, Mims MC, Streelman JT. 2007 Do constructional constraints influence  
514 cichlid craniofacial diversification? *Proc. R. Soc. B Biol. Sci.* **274**, 1867–1875.  
515 (doi:10.1098/rspb.2007.0444)
- 516 36. Cooper WJ, Westneat MW. 2009 Form and function of damselfish skulls: Rapid  
517 and repeated evolution into a limited number of trophic niches. *BMC Evol. Biol.* **9**,  
518 24. (doi:10.1186/1471-2148-9-24)
- 519 37. Genner MJ, Seehausen O, Cleary DFR, Knight ME, Michel E, Turner GF. 2004  
520 How does the taxonomic status of allopatric populations influence species  
521 richness within African cichlid fish assemblages? *J. Biogeogr.* **31**, 93–102.  
522 (doi:10.1046/j.0305-0270.2003.00986.x)
- 523 38. Barlow G. 2008 *The cichlid fishes: nature's grand experiment in evolution*. See  
524 [https://books.google.com/books?hl=en&lr=&id=LME6bc4m6QcC&oi=fnd&pg=PR9](https://books.google.com/books?hl=en&lr=&id=LME6bc4m6QcC&oi=fnd&pg=PR9&dq=barlow+cichlid&ots=i_LH7pD9ai&sig=6cMb8AC7RHPbdY3D4JInvqGvkyY)  
525 [&dq=barlow+cichlid&ots=i\\_LH7pD9ai&sig=6cMb8AC7RHPbdY3D4JInvqGvkyY](https://books.google.com/books?hl=en&lr=&id=LME6bc4m6QcC&oi=fnd&pg=PR9&dq=barlow+cichlid&ots=i_LH7pD9ai&sig=6cMb8AC7RHPbdY3D4JInvqGvkyY).
- 526 39. Vera LM, Cairns L, Sánchez-Vázquez FJ, Migaud H. 2009 Circadian Rhythms of  
527 Locomotor Activity in the Nile Tilapia *Oreochromis niloticus*. *Chronobiol. Int.* **26**,  
528 666–681. (doi:10.1080/07420520902926017)
- 529 40. del Pozo A, Sánchez-Férez JA, Sánchez-Vázquez FJ. 2011 Circadian Rhythms of  
530 Self-feeding and Locomotor Activity in Zebrafish ( *Danio Rerio* ). *Chronobiol. Int.*  
531 **28**, 39–47. (doi:10.3109/07420528.2010.530728)
- 532 41. Reeb SG. 1994 Nocturnal Mate Recognition and Nest guarding by Female  
533 Convict Cichlids (Pisces, Cichlidae: *Cichlasoma mgrofasciatum*). *Wiley Online*



- 534 *Libr.* **96**, 303–312. (doi:10.1111/j.1439-0310.1994.tb01018.x)
- 535 42. Reeb SG. 2002 Plasticity of diel and circadian activity rhythms in fishes. *Rev.*  
536 *Fish Biol. Fish.* **12**, 349–371. (doi:10.1023/A:1025371804611)
- 537 43. Won YJ, Sivasundar A, Wang Y, Hey J. 2005 On the origin of Lake Malawi cichlid  
538 species: A population genetic analysis of divergence. *Proc. Natl. Acad. Sci. U. S.*  
539 *A.* **102**, 6581–6586. (doi:10.1073/pnas.0502127102)
- 540 44. Conith MR, Hu Y, Conith AJ, Maginnis MA, Webb JF, Craig Albertson R. 2018  
541 Genetic and developmental origins of a unique foraging adaptation in a Lake  
542 Malawi cichlid genus. *Proc. Natl. Acad. Sci. U. S. A.* **115**, 7063–7068.  
543 (doi:10.1073/pnas.1719798115)
- 544 45. Conith MR, Conith AJ, Albertson RC. 2019 Evolution of a soft-tissue foraging  
545 adaptation in African cichlids: Roles for novelty, convergence, and constraint.  
546 *Evolution (N. Y.)*. **73**, 2072–2084. (doi:10.1111/evo.13824)
- 547 46. Albertson RC, Pauers MJ. 2019 Morphological disparity in ecologically diverse  
548 versus constrained lineages of Lake Malaŵi rock-dwelling cichlids. *Hydrobiologia*  
549 **832**, 153–174. (doi:10.1007/s10750-018-3829-z)
- 550 47. Keene AC, Duboue ER. 2018 The origins and evolution of sleep. *J. Exp. Biol.*  
551 **221**. (doi:10.1242/jeb.159533)
- 552 48. Prober DA, Rihel J, Onah AA, Sung RJ, Schier AF. 2006 Hypocretin/orexin  
553 overexpression induces an insomnia-like phenotype in zebrafish. *J. Neurosci.* **26**,  
554 13400–13410. (doi:10.1523/JNEUROSCI.4332-06.2006)
- 555 49. Duboué ER, Keene AC, Borowsky RL. 2011 Evolutionary Convergence on Sleep  
556 Loss in Cavefish Populations. *Curr. Biol.* **21**, 671–676.

557 (doi:10.1016/J.CUB.2011.03.020)

558 50. Aspiras AC, Rohner N, Martineau B, Borowsky RL, Tabin CJ. 2015 Melanocortin  
559 4 receptor mutations contribute to the adaptation of cavefish to nutrient-poor  
560 conditions. *Proc. Natl. Acad. Sci. U. S. A.* **112**, 9668–73.

561 (doi:10.1073/pnas.1510802112)

562

563 **Table 1**  
 564 General information about the Lake Malawi species under study. Information based on [30,31]. Abbreviations: G =  
 565 generalist, S = specialist, N = non-territorial, T = territorial, W = weakly territorial, SL = standard length.  
 566

| Genus                 | species                     | Clade              | Habitat                              | Depth              | Prey Type                     | Specialist/ |             |           | Distribution                                        |
|-----------------------|-----------------------------|--------------------|--------------------------------------|--------------------|-------------------------------|-------------|-------------|-----------|-----------------------------------------------------|
|                       |                             |                    |                                      | distribution       |                               | Generalist  | Territorial | Size (SL) |                                                     |
| <i>Aulonocara</i>     | <i>stuartgranti</i>         | Deep Benthic       | Intermediate                         | 5-15m              | Benthic invertebrates         | S           | T           | <10cm     | Lake-wide                                           |
| <i>Copadichromis</i>  | <i>trewavasae</i>           | Utaka              | Intermediate/open water              | 10-30m             | Zooplankton                   | S           | T           | <10cm     | Lake-wide                                           |
| <i>Dimidiochromis</i> | <i>compressiceps</i>        | Shallow Benthic    | Intermediate with plants             | <30m               | Small fish/fry                | S           | W           | 10-20cm   | Lake-wide                                           |
| <i>Sciaenochromis</i> | <i>fryeri</i>               | "Old" sand dweller | Intermediate                         | 10-40m             | Small fish/fry                | S           | W           | 12-14cm   | Lake-wide                                           |
| <i>Tropheops</i>      | sp. "red fin"               | <i>mbuna</i>       | Rocks with sediment                  | >10m               | Algae/detritus                | G           | T           | <10cm     | Lake-wide                                           |
| <i>Tropheops</i>      | sp. "elongatus<br>Boadzulu" | <i>mbuna</i>       | Rocks with sediment                  | >10m               | Algae/plankton/<br>detritus   | G           | T           | <10cm     | Specific locations,<br>south                        |
| <i>Tropheops</i>      | sp. "red cheek"             | <i>mbuna</i>       | Sediment-free rocks                  | <10m               | Attached filamentous<br>algae | S           | T           | <10cm     | Specific locations,<br>south and north <sup>2</sup> |
| <i>Labeotropheus</i>  | <i>trewavasae</i>           | <i>mbuna</i>       | Between/under rocks<br>with sediment | 0-20m              | Algae/detritus                | G           | W           | <10cm     | Lake-wide                                           |
| <i>Labeotropheus</i>  | <i>fuelleborni</i>          | <i>mbuna</i>       | Sediment-free rocks                  | <10m <sup>1</sup>  | Attached filamentous<br>algae | S           | T           | 10+cm     | Lake-wide                                           |
| <i>Maylandia</i>      | <i>zebra</i>                | <i>mbuna</i>       | Diverse rocky habitat                | 5-20m              | Loose algae                   | G           | T           | <10cm     | Lake-wide                                           |
| <i>Iodotropheus</i>   | <i>sprengerae</i>           | <i>mbuna</i>       | Diverse rocky<br>and intermediate    | 3-15m <sup>1</sup> | Diverse omnivorous            | G           | N           | <10cm     | Southeast                                           |

567  
 568  
 569 <sup>1</sup> These species have been observed to penetrate much deeper waters (e.g., ~40m).  
 570 <sup>2</sup> This distribution pattern suggests a lake-wide historical distribution.  
 571

572 **Figures**

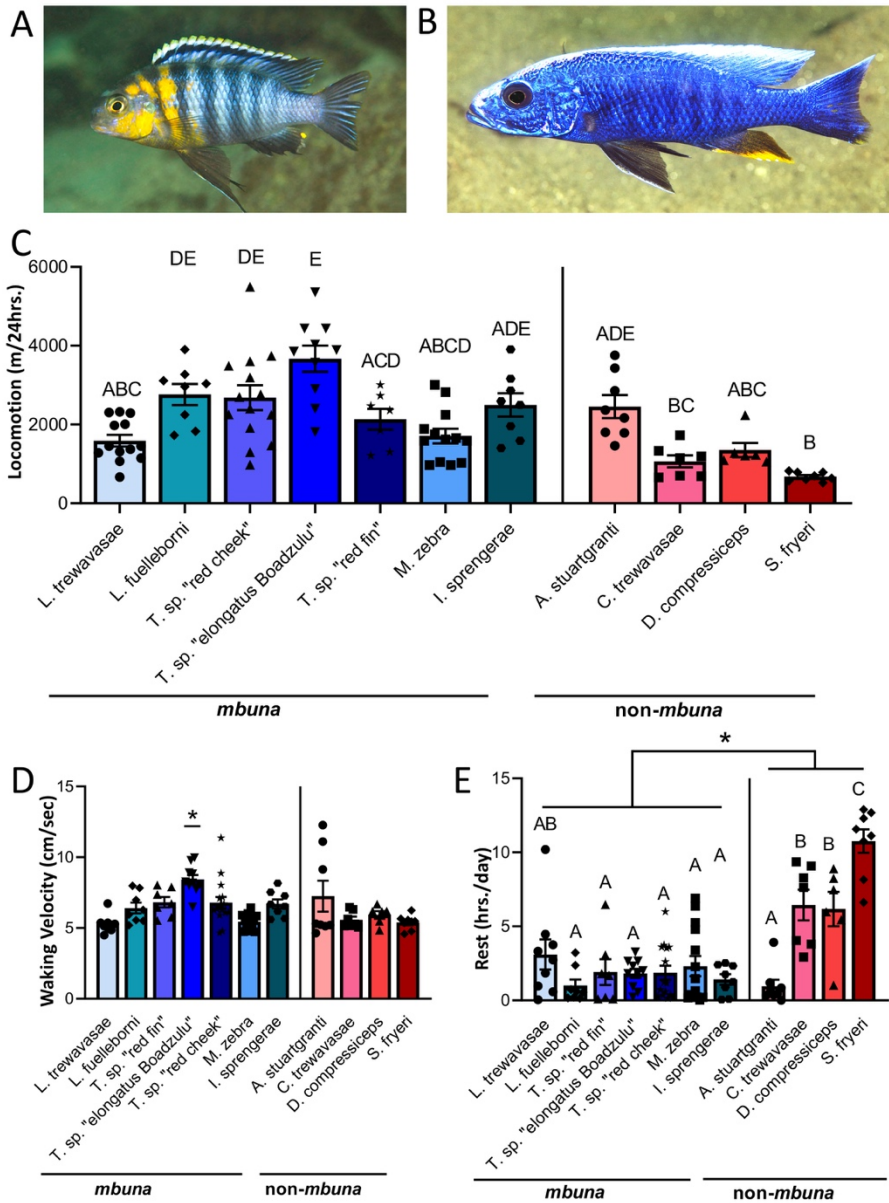

573

574 **Fig 1.** Evolved differences in locomotor activity between cichlid species. (A) Morphology  
 575 of *T. sp. "red cheek"* of the *mbuna* group. (B) Morphology of *S. fryeri* of the *non-mbuna*  
 576 group. Images by Ad Konings, Cichlid Press. (C) Total locomotor activity over 24 hours  
 577 varies significantly across 11 cichlid species (one-way ANOVA:  $F_{10,91} = 11.10$ ,  
 578  $p < 0.0001$ ). *Mbuna* species trend towards higher activity than *non-mbuna* species,  
 579 although this relationship does not reach significance (nested ANOVA,  $F_{1,9} = 5.009$ ). (D)  
 580 Waking velocity over 24 hours is significantly elevated in only one species of cichlid,  
 581 *Tropheops sp. "elongatus Boadzulu"* (one-way ANOVA,  $F_{10,89} = 5.398$ ). (E)  
 582 Consolidated periods of rest (>60 seconds) vary significantly across *mbuna* and non-  
 583 *mbuna* groups. (nested ANOVA,  $F_{1,9} = 7.808$ ,  $p = 0.0209$ ).

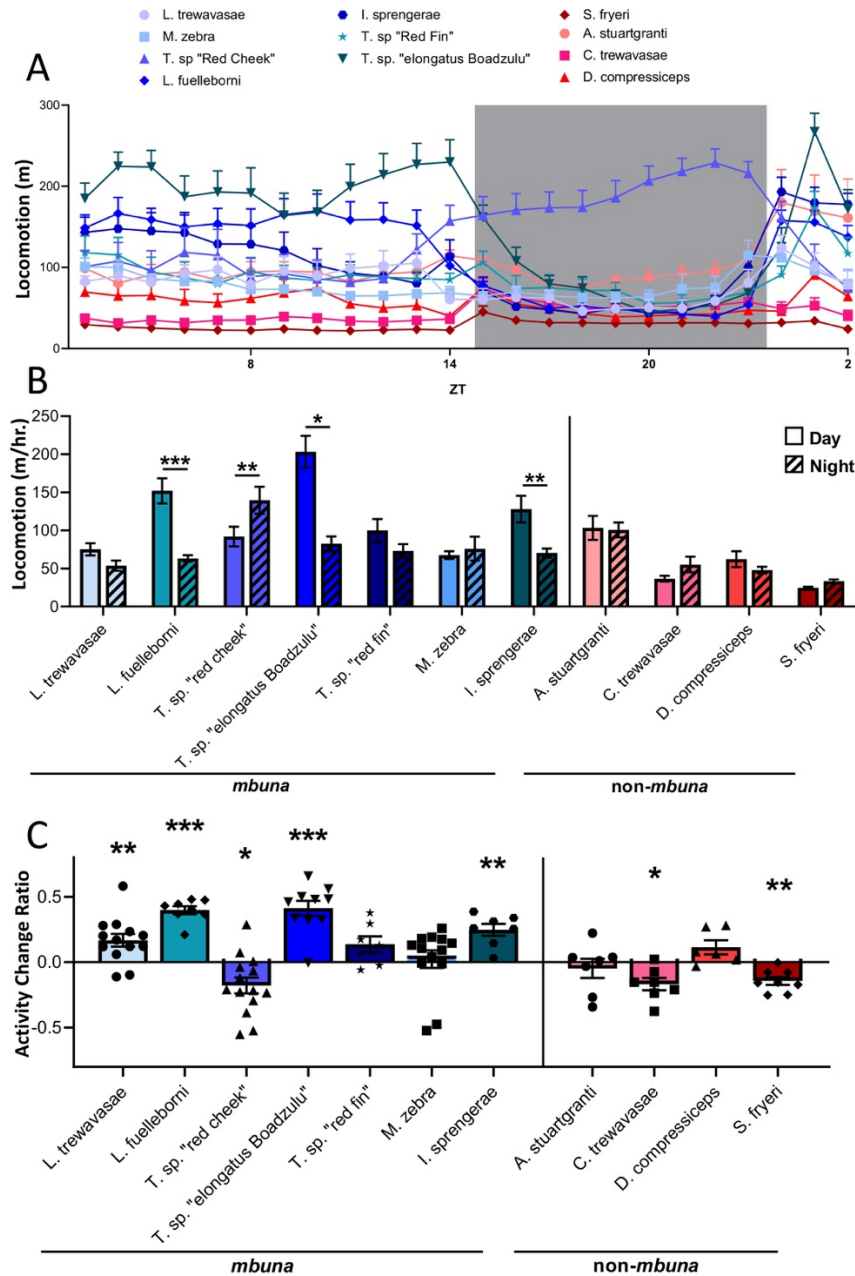

584

585 **Fig 2.** Variation in daily activity rhythms across the day/night cycle. (A) Activity profiles  
 586 of all species tested across 24 hours, beginning at ZT3. (B) Several species exhibit  
 587 significantly increased activity during the subjective day (*L. fuelleborni*, *T. sp. "elongatus*  
 588 *Boadzulu"*, *I. sprengerae*) while a single species exhibits increased locomotor activity  
 589 during the subjective night (*T. sp. "red cheek"*) (two-way ANOVA,  $F_{10,91} = 13.27$ ). (C)  
 590 Activity change scores, calculated as the difference between daytime and nighttime  
 591 activity, divided by their sum, reveal differences in day/night preference across cichlid  
 592 species (one-sample t-test; *L. trewavasae* ( $t_{12} = 3.419$ ,  $p = 0.0051$ ), *L. fuelleborni* ( $t_7 =$   
 593  $12.93$ ,  $p < 0.0001$ ), *T. sp. "red cheek"* ( $t_{13} = 2.930$ ,  $p < 0.0117$ ), *T. sp. "elongatus*  
 594 *Boadzulu"* ( $t_9 = 7.182$ ,  $p < 0.0001$ ), *I. sprengerae* ( $t_6 = 5.374$ ,  $p = 0.0017$ ), *C. trewavasae*  
 595 ( $t_6 = 3.555$ ,  $p = 0.012$ ), *S. fryeri* ( $t_7 = 4.693$ ,  $p = 0.0022$ ).

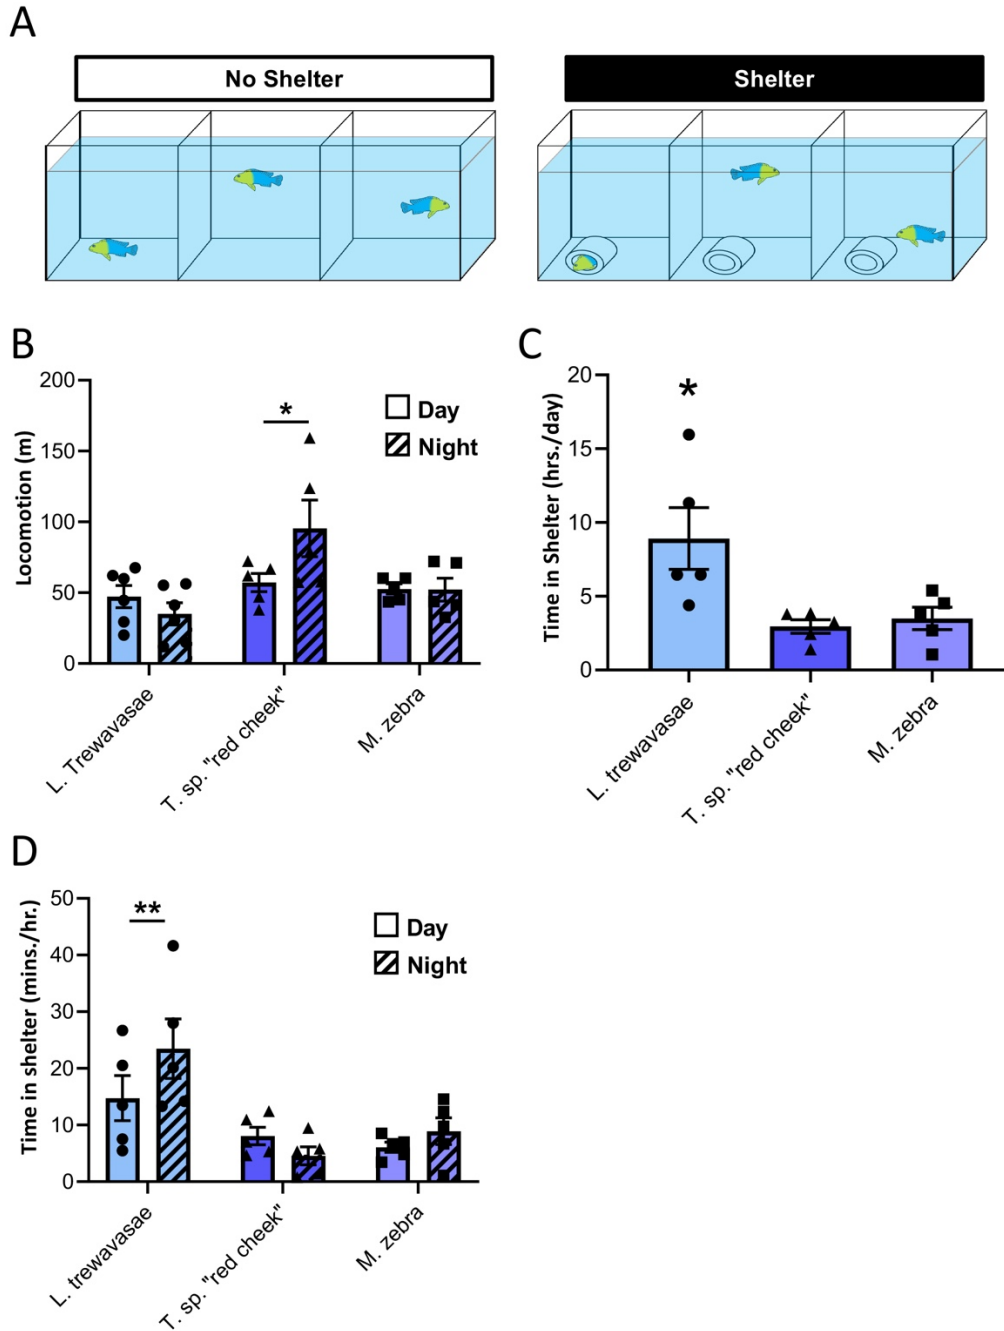

596

597 **Fig 3.** Presence or absence of shelter does not affect the nocturnal phenotype of *T. sp.*  
 598 "red cheek". (A) Select cichlid species were tested for locomotor activity over 24 hours  
 599 in the presence or absence of a 3 inch PVC tube, providing the option to take shelter at  
 600 any point during the day. (B) *T. sp. "red cheek"* maintain bias for nocturnal activity in the  
 601 presence of shelter (two-way ANOVA,  $F_{2,12} = 7.9$ ,  $p = 0.0065$ ). (C) *L. trewavasae* exhibit  
 602 significantly greater preference for the shelter relative to other species tested, consistent  
 603 with knowledge of the species' ecological niche (one-way ANOVA,  $F_{2,12} = 6.305$ ,  $p =$   
 604 0.0134). (D) Preference for shelter increases at night only in *L. trewavasae* (two-way  
 605 ANOVA,  $F_{2,12} = 7.9$ ,  $p = 0.0065$ ).

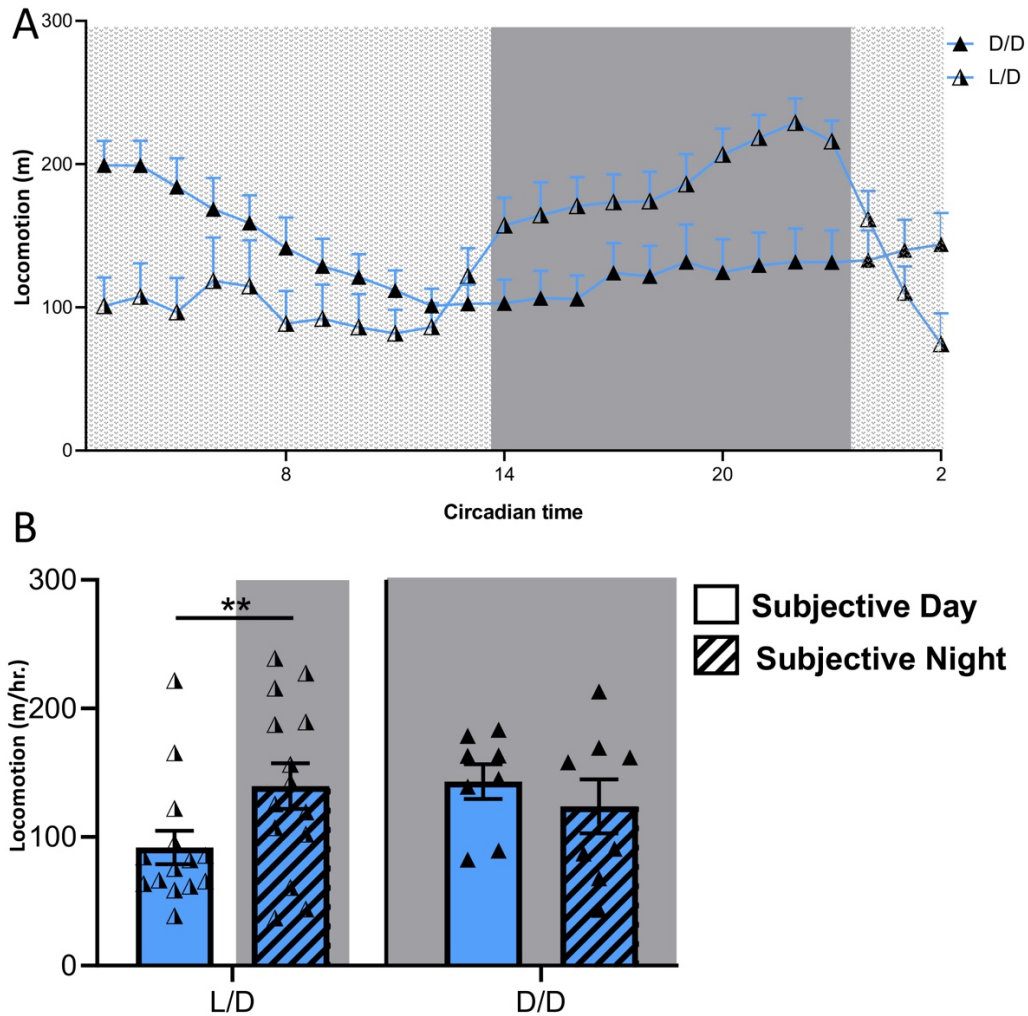

606

607 **Fig 4.** Locomotor activity in *T. sp.* "red cheek" is modulated by the presence/absence of  
608 light. (A) Activity profiles of *T. sp.* "red cheek" under a 14:10 LD cycle (half-shaded  
609 triangles), and in constant darkness (fully shaded triangles). (B) Under a 14:10 LD  
610 cycle, *T. sp.* "red cheek" increase activity during the day; in 24 hours of darkness,  
611 activity remains elevated throughout the 24-hour period (two-way ANOVA,  $F_{1, 20} = 7.393$ ,  
612  $p = 0.0132$ ).

613



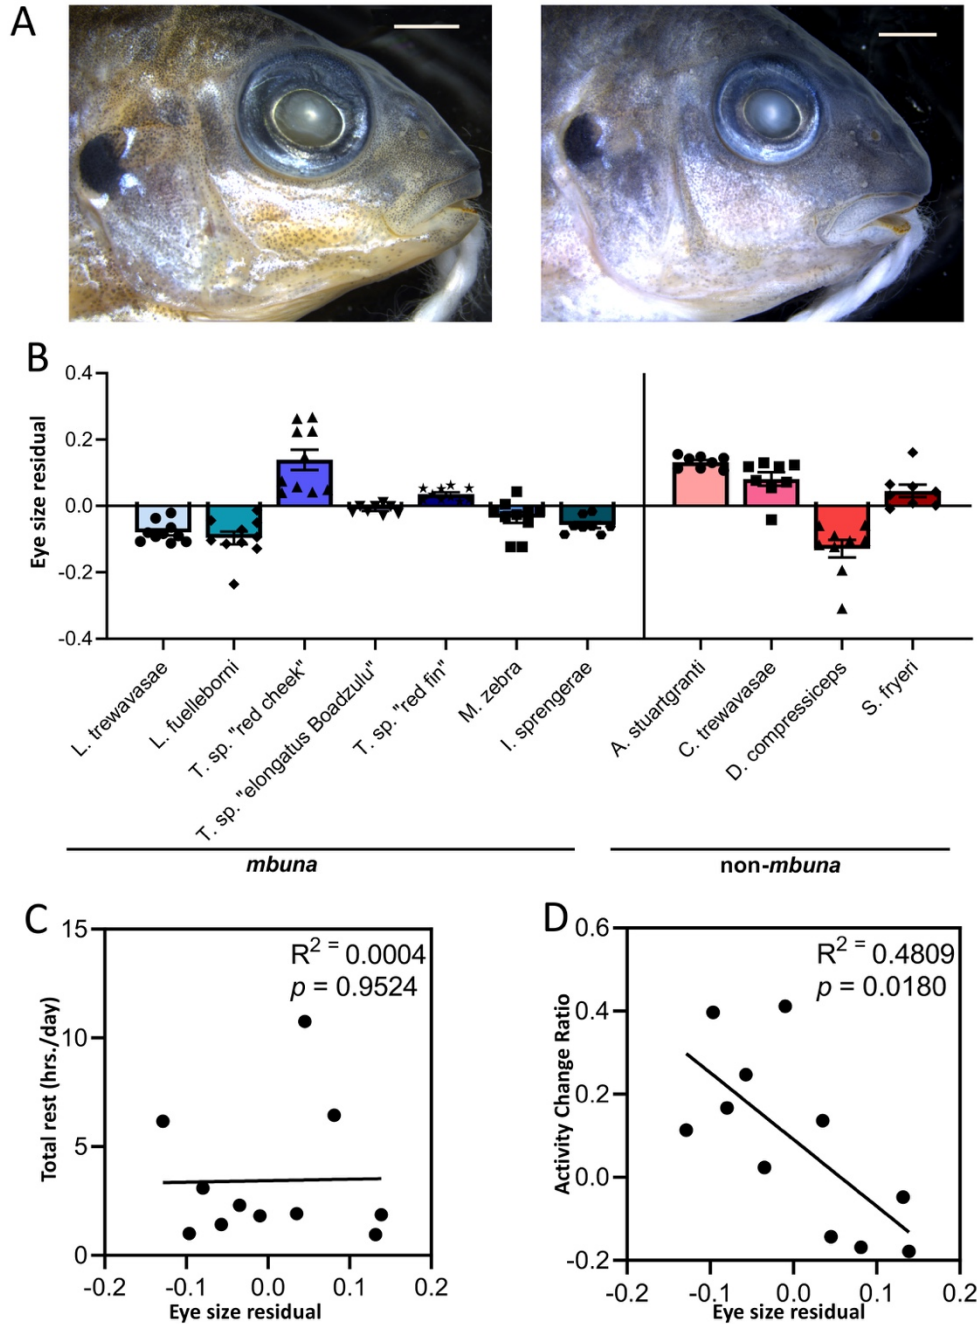

614

615 **Fig 5.** (A) Photographs demonstrating difference in relative eye size between *T. sp. "red*  
616 *cheek"*, left, and *L. fuelleborni*, right. Both specimens were approximately 4 months old.  
617 Scale bars equal 2mm. (B) Variation in eye size across species. (C) There is no  
618 relationship between eye size and total rest amount. (D) There is a significant negative  
619 relationship between eye size and a bias towards daytime activity.  
620
